# Supplementary material
Source: Springer Nature journal article supplement (https://www.springermedizin.de/resource/supplementary/40644_2014_128_MOESM2_ESM.pdf/25787144)

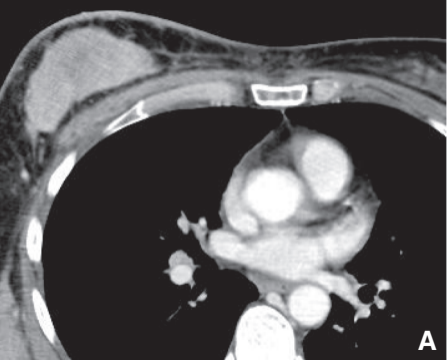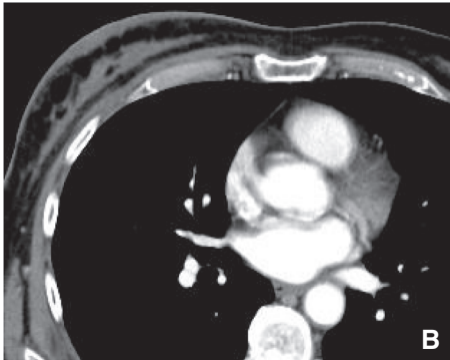

Supplement: MOESM2 [file 25787144]
